# Supplementary material for: Integrating transcriptomic datasets across neurological disease identifies unique myeloid subpopulations driving disease‐specific signatures
Source: PubMed Central journal article supplement — Glia. 2022 Dec 16;71(4):904–25. doi: 10.1002/glia.24314 (PMC10952672; doi:10.1002/glia.24314), 2022-12-16

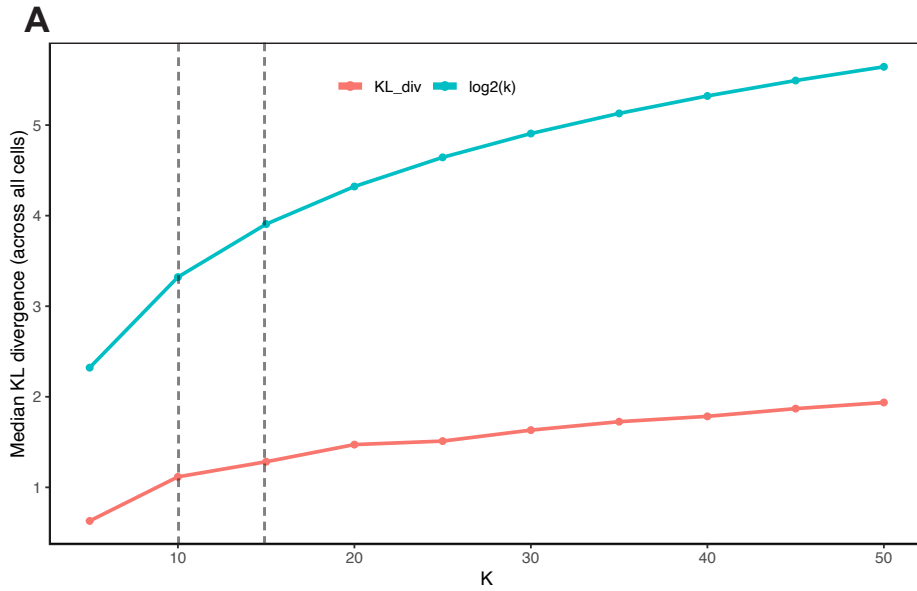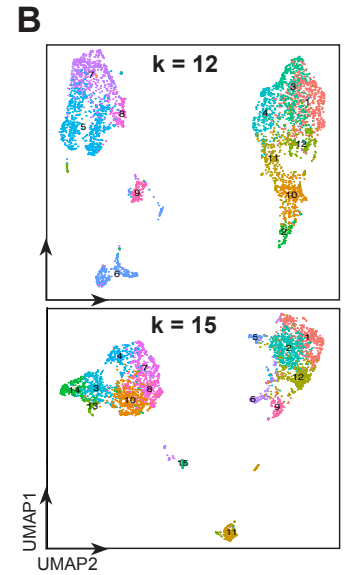

**C Myeloid subclusters (k=12)**

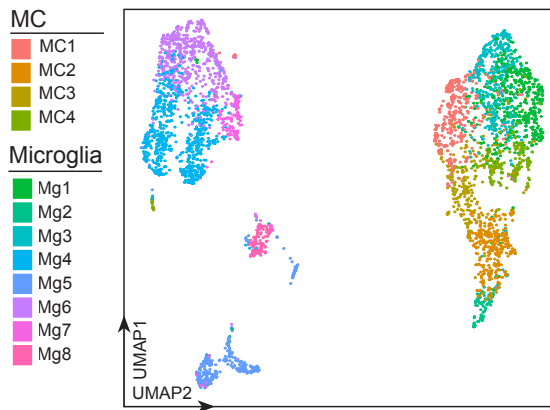

**D Anatomical location of subclusters**

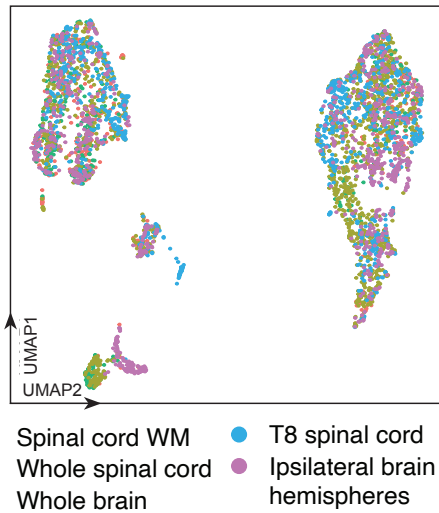

**E Expression of MC and microglial-enriched genes**

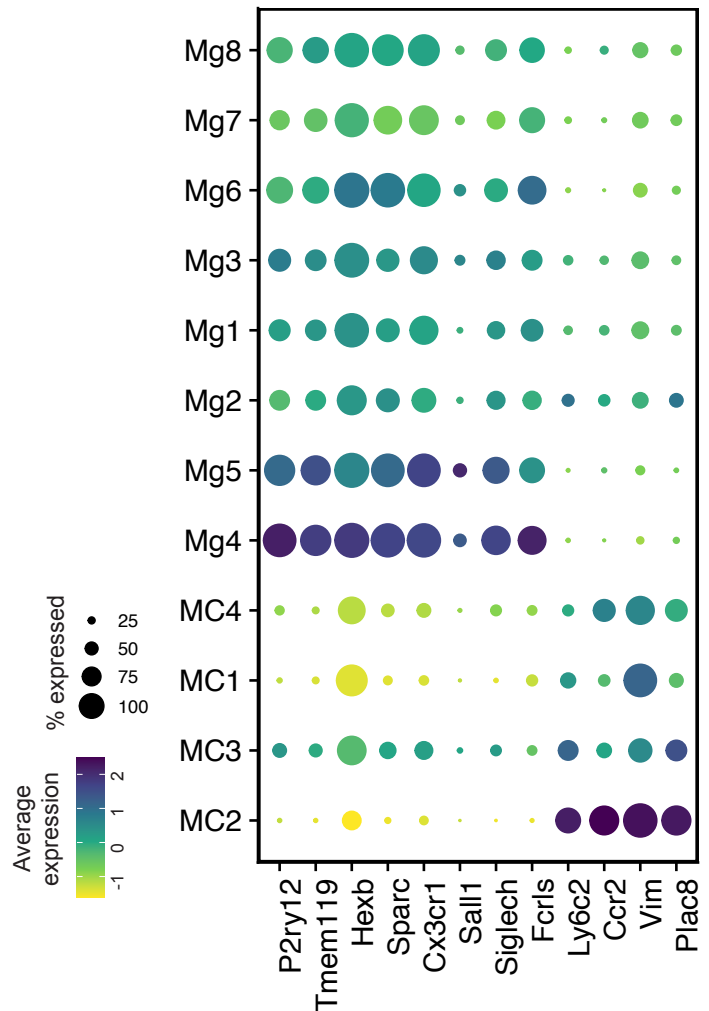

**F Expression of microglia-specific genes**

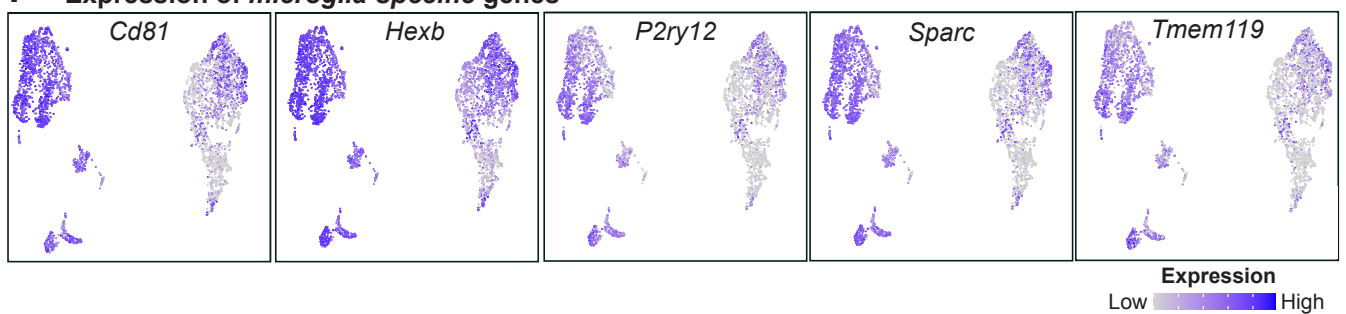

Supplement: GLIA-71-904-s003.pdf [file GLIA-71-904-s003.pdf]
