# Supplementary figures and images for: Integrating transcriptomic datasets across neurological disease identifies unique myeloid subpopulations driving disease‐specific signatures
Source: PubMed Central journal article supplement — Glia. 2022 Dec 16;71(4):904–25. doi: 10.1002/glia.24314 (PMC10952672; doi:10.1002/glia.24314), 2022-12-16

# Spleen

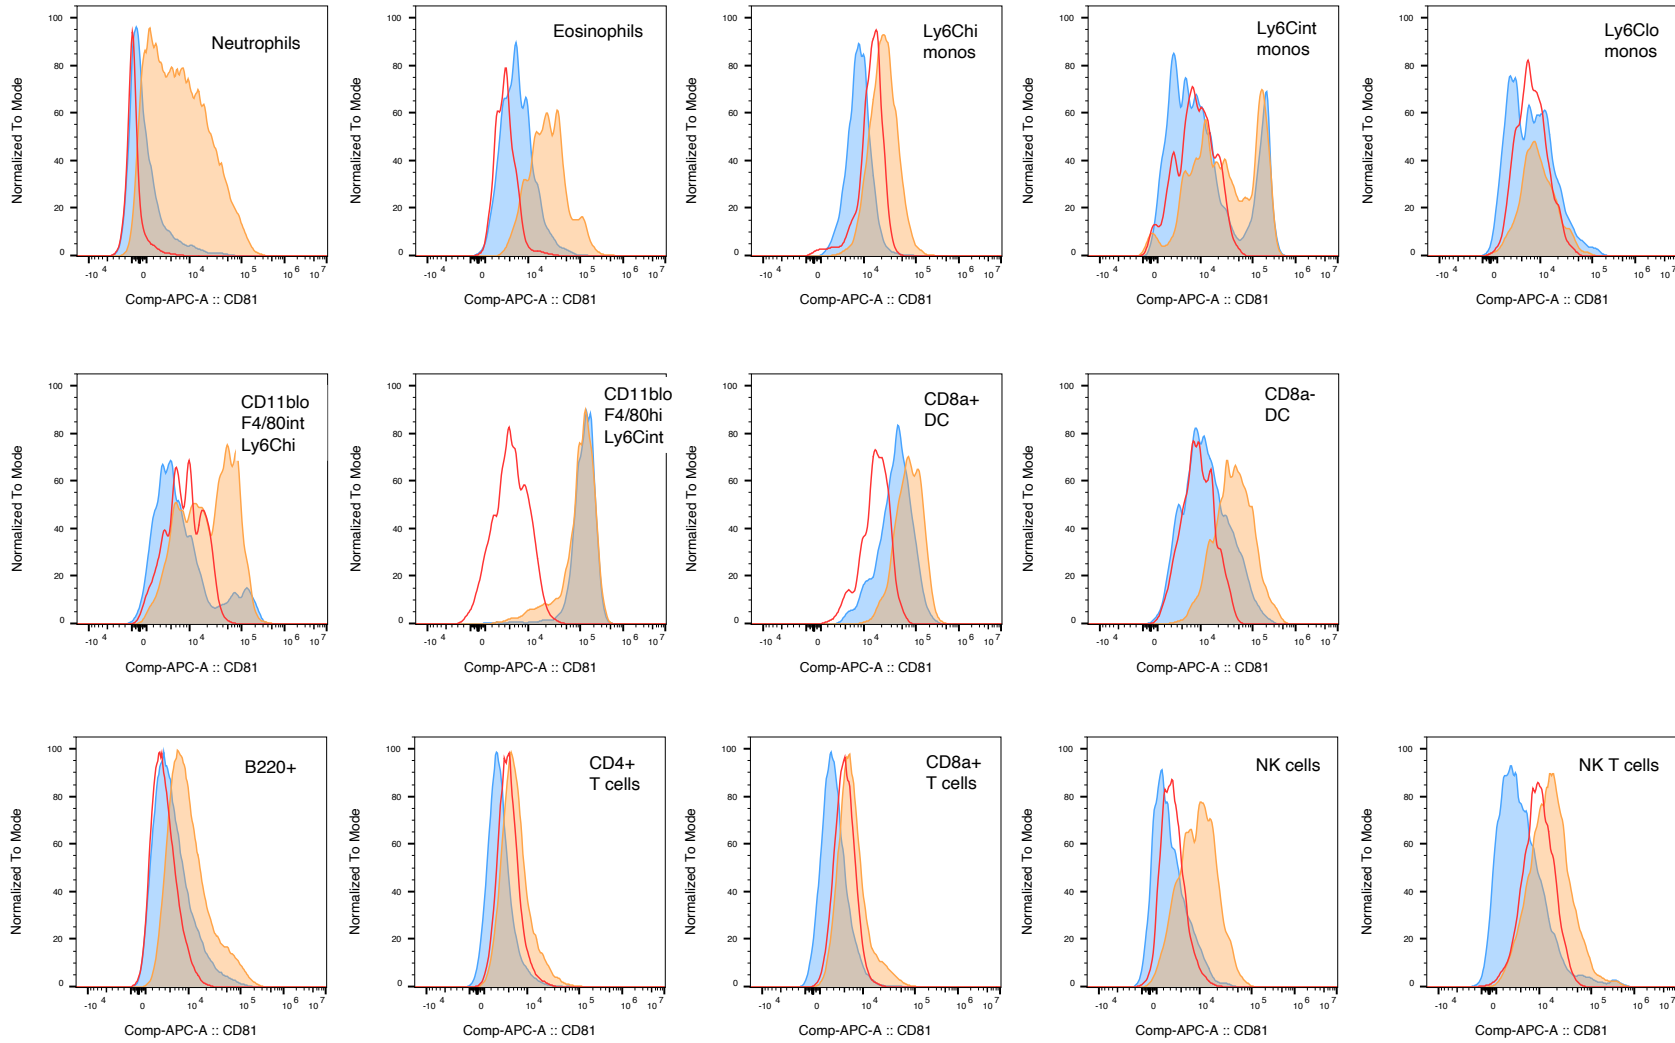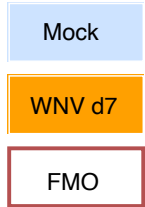

Supplement: GLIA-71-904-s008.pdf [file GLIA-71-904-s008.pdf]

# Bone marrow

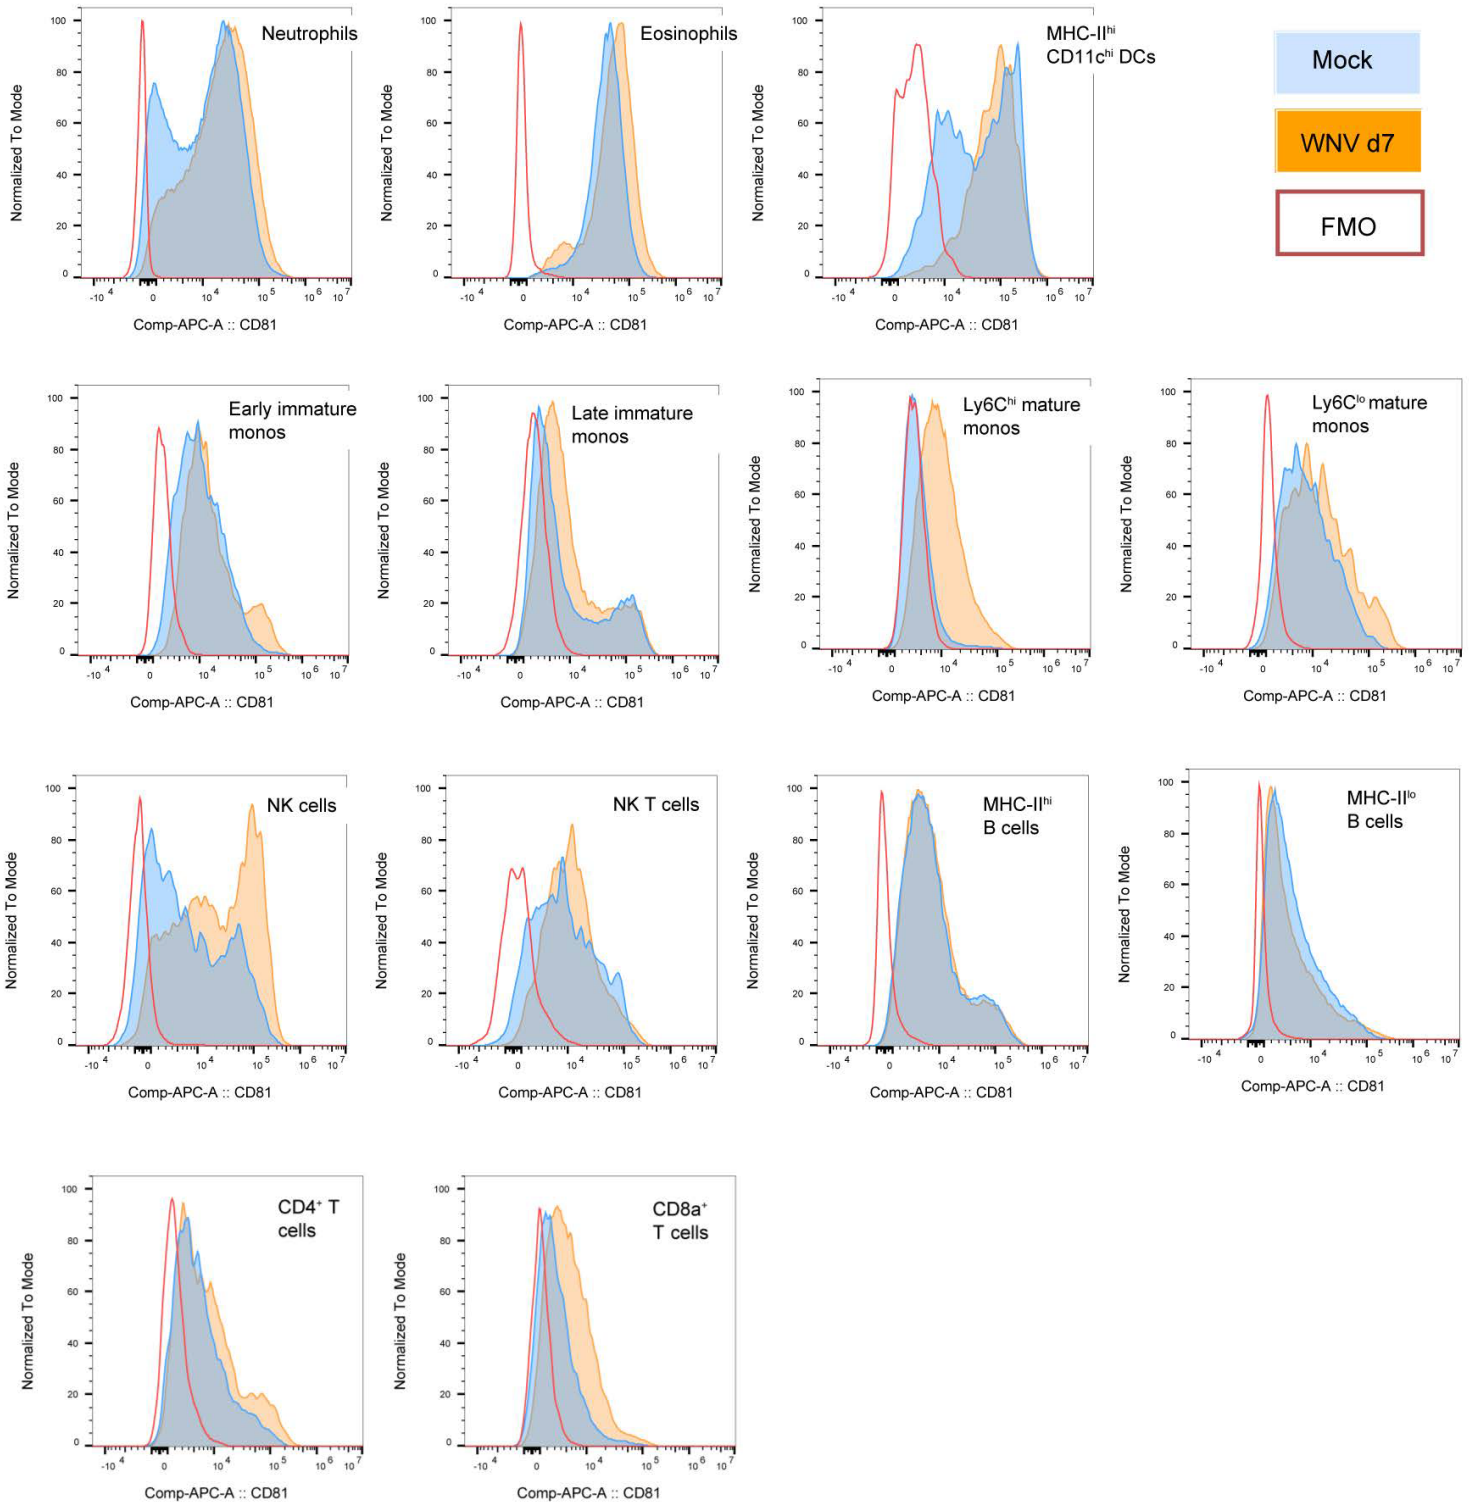

Supplement: GLIA-71-904-s009.pdf [file GLIA-71-904-s009.pdf]
